# Supplementary material
Source: PubMed Central journal article supplement (PMC6650725)
Supplement: ba027714-suppl1.pdf [file ba027714-suppl1.pdf]

1 **Supplemental Figures- De La Garza et al.**

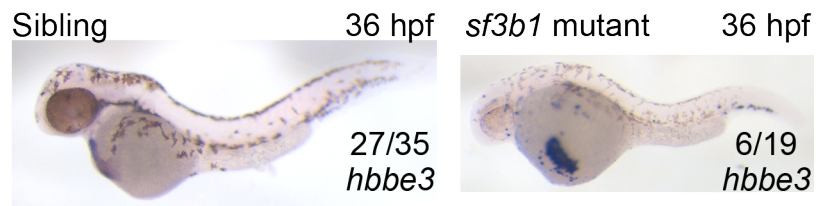

De La Garza et al. Figure S1

2

3 **Figure S1. Embryonic globin expression aberrantly persists in *sf3b1* mutants.** *In situ*  
4 hybridization of early globin *hbbe3* in siblings and *sf3b1* mutants at 36 hpf. Numbers in lower  
5 right denote number of embryos that displayed a similar phenotype to the image.

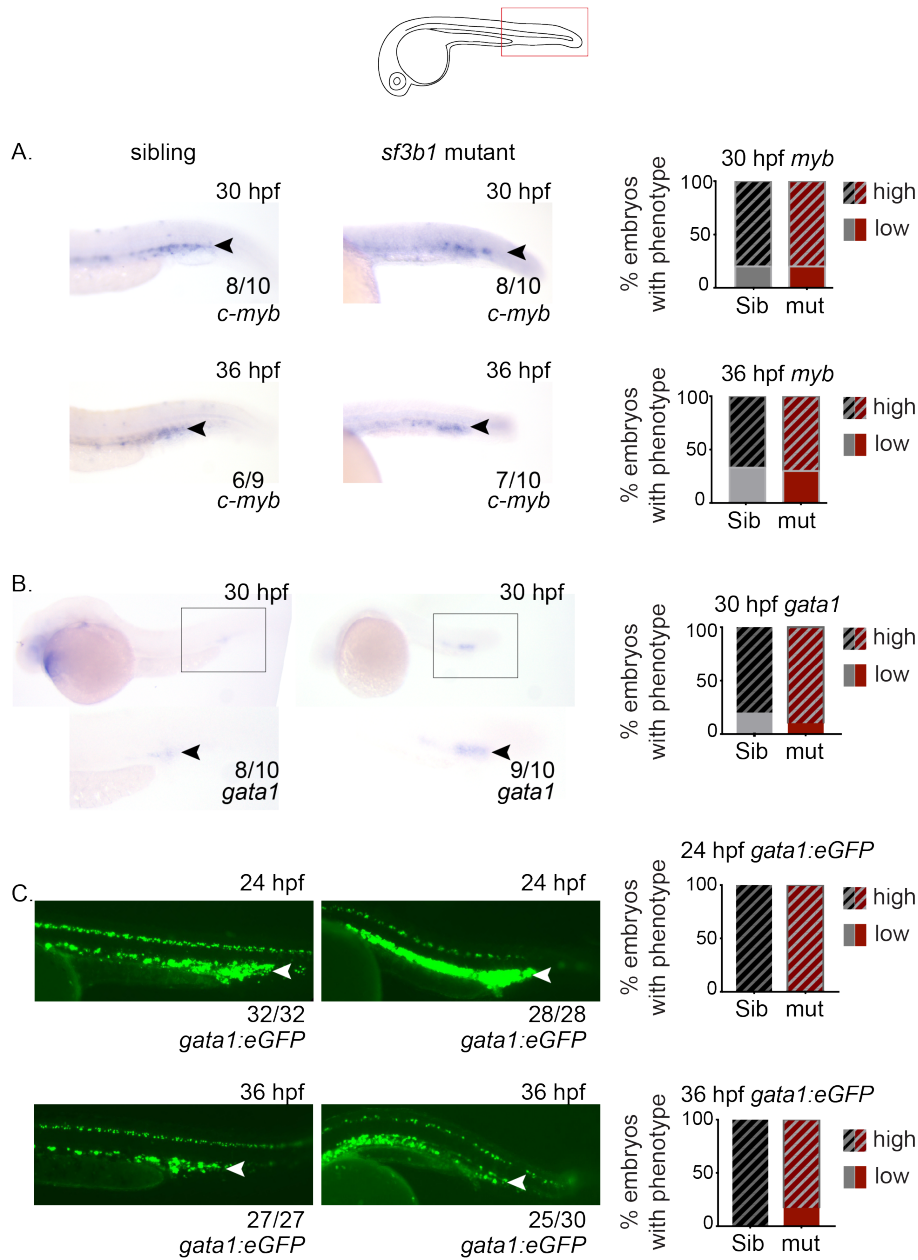

6

De La Garza et al. Figure S2

7 **Figure S2. EMP progenitors formation is intact in *sf3b1* mutants.** **A.** *In situ* hybridization of  
 8 *c-myb* in siblings and *sf3b1* mutants at 30 and 36 hpf. **B.** *In situ* hybridization of *gata1* in siblings  
 9 and *sf3b1* mutants at 30 hpf. Inset below shows a higher magnification view of area boxed in  
 10 the image above. **C.** Images of *gata1:eGFP* signal in the EMP region in siblings and *sf3b1*  
 11 mutants at 24 and 36 hpf. Arrowheads denote the PBI region. For A-C, numbers in lower right  
 12 denote number of embryos that displayed a similar phenotype to the image. Graphs to the right  
 13 denote the percentage of embryos with the designated phenotype.

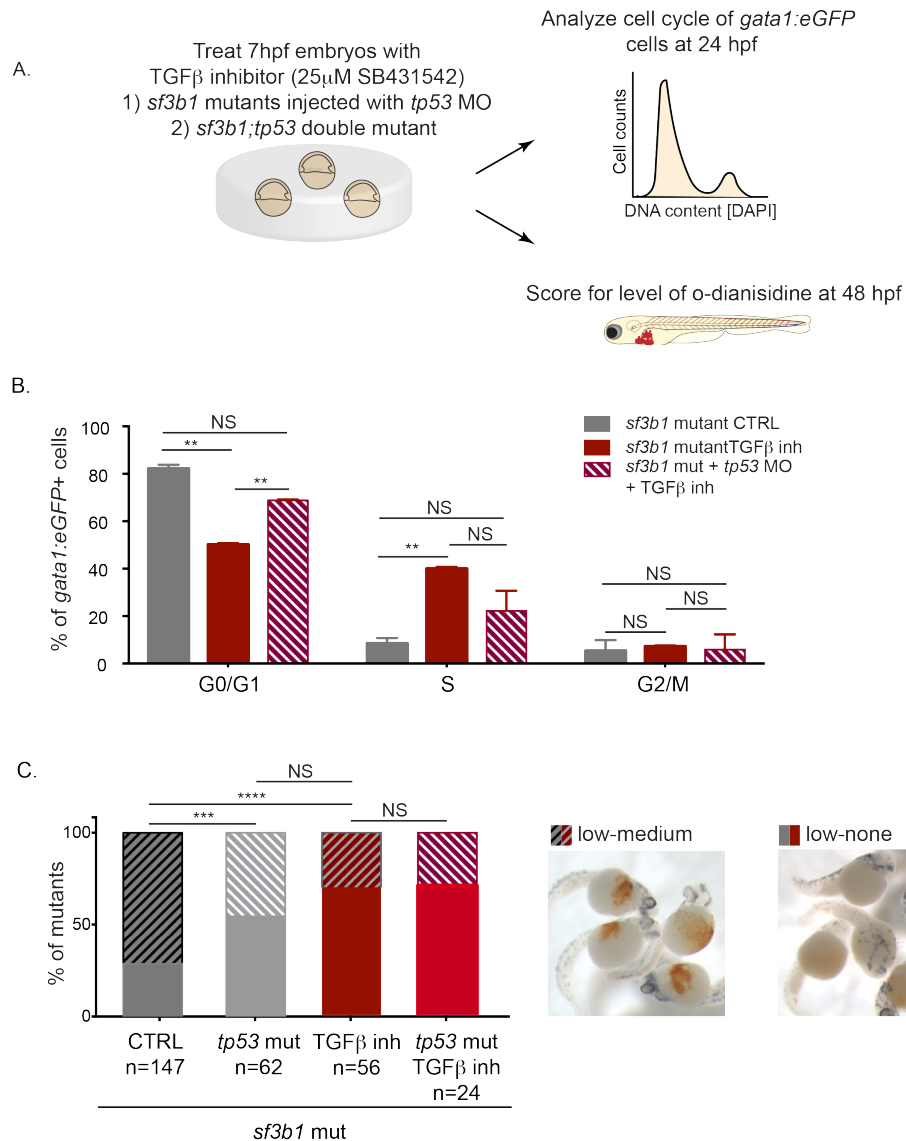

14

De La Garza et al. Figure S3

15 **Figure S3. Diminished Tp53 activity has minimal effect on TGF $\beta$ -mediated cell cycle**  
 16 **arrest and *sf3b1* mutant anemia. A.** Schematic of experiment to determine the effect of  
 17 diminished *p53* function + TGF $\beta$  inhibition on erythroid cell cycle arrest or anemia in *sf3b1*  
 18 mutants. **B.** Graph quantifying the percentage of *gata1:eGFP*-positive erythrocytes in G0/G1, S,  
 19 or G2/M phases of the cell cycle at 24 hpf in *sf3b1* mutants treated with DMSO, 25 $\mu$ M TGF $\beta$   
 20 inhibitor SB431542, or *tp53* morpholino + SB431542. ANOVA with Bonferroni FDRmulti-testing  
 21 correction **C.** Graph showing frequency of *sf3b1* mutants and *sf3b1;tp53* double mutants with  
 22 designated levels of o-dianisidine-positive oxygenated erythrocytes at 48 hpf treated with DMSO  
 23 or 25 $\mu$ M TGF $\beta$  inhibitor SB431542. Total number of mutants analyzed per treatment group is

24 listed below the graph. Images of *sf3b1* mutant embryos with low-medium or low-none o-  
25 dianisidine-positive cells are shown to the right. Significance of comparison between groups  
26 determined by Fisher's Exact Test. All experiments were done in biological triplicates. \*\*<0.01,  
27 \*\*\*<0.001, \*\*\*\*<0.0001.
